# Supplementary material for: Needles in the Haystack: Identifying Individuals Present in Pooled Genomic Data
Source: PLoS Genet. 2009 Oct 2;5(10):e1000668. doi: 10.1371/journal.pgen.1000668 (PMC2747273; doi:10.1371/journal.pgen.1000668)
Supplement: Text S1 — Di and T under the null hypothesis. (0.22 MB PDF) [file pgen.1000668.s001.pdf]

## Text S1: $D_i$ and $T$ under the null hypothesis

Here, we show analytically how deviations from the assumptions underlying Equations 1, 2 result in a null distribution which is not a standard normal.

Let us assume an underlying population  $P$  with MAFs  $p_i$  from which samples  $F$  (of size  $n_F$ ) and  $G$  (of size  $n_G$ ) are drawn i.i.d. Consider now an additional sample  $Y$ . The null hypothesis is that  $Y$  was drawn from  $P$ , independent of  $F$  and  $G$ ; the alternative of interest is that  $Y$  is drawn from  $G$  (or, symmetrically,  $F$ ). Under these idealized circumstances, we observe that:

$$f_i \sim \text{Bin}(2n_F, p_i)/2n_F, \quad (\text{S1-1})$$

$$g_i \sim \text{Bin}(2n_G, p_i)/2n_G, \quad (\text{S1-2})$$

$$y_i \sim \text{Bin}(2, p_i)/2, \quad (\text{S1-3})$$

where the factors of two are a consequence of each sample possessing two independent alleles per locus. In [1], it is proposed that  $T$  (the  $Z$ -score of  $D_i$  across all SNPs) follows a standard normal distribution (Equations 1,2). This proposition rests upon two assumptions: namely, that the mean  $\langle D_i \rangle$  across all SNPs under the null hypothesis is zero, i.e.,  $\mu_0 = 0$  in Equation 2; and that the SNPs  $i$  are completely independent such that we can write the variance of the mean as the mean variance, ie,  $\text{Var}(\langle D_i \rangle) = \text{Var}(D_i)/s$  in the denominator of Equation 2. Below, we consider sources of deviation from  $T \sim N(0, 1)$  under the null hypothesis.

### Deviations from $\mu_0 = 0$

In the large-sample limit, under the null hypothesis,

$$\lim_{n_F \rightarrow \infty} f_i = p_i ; \quad \lim_{n_G \rightarrow \infty} g_i = p_i, \quad (\text{S1-4})$$

and hence

$$\lim_{n_F, n_G \rightarrow \infty} D_i = \lim_{n_F, n_G \rightarrow \infty} (|y_i - f_i| - |y_i - g_i|) = 0. \quad (\text{S1-5})$$

Intuition might further suggest that since  $f_i$  and  $g_i$  are both drawn from binomial distributions which are symmetric about  $p_i$ , any sampling deviations resulting from finite  $n_F, n_G$  will fall symmetrically, and hence  $\mu_0 = 0$ . As we will show below, however, this conclusion is sensitive to two assumptions:

1. that  $F$ ,  $G$  and  $Y$  are drawn from the same underlying population;

2. that the sample sizes  $n_F$  and  $n_G$  are not only large, but comparable.

Because the number of SNPs  $s$  is quite large, slight deviations away from  $\mu_0 = 0$  have the power to shift the location of the null distribution of  $T$  considerably, rendering  $T$  incomparable to a standard normal unless the true  $\mu_0$  is known. Consider that the difference in  $T$  with and without the  $\mu_0 = 0$  assumption is

$$T - T_{\mu_0=0} = \frac{\mu_0}{\sqrt{\text{Var}(D_i)/s}} \quad (\text{S1-6})$$

and that because  $D_i$  ranges on  $(-1, 1)$ ,  $\max(\text{Var}(D_i)) = 2$ . This means that

$$\min(T - T_{\mu_0=0}) = \frac{\sqrt{s}}{\sqrt{2}} \mu_0 \quad (\text{S1-7})$$

which can be quite large for even small values of  $\mu_0$  since the number of SNPs  $s$  is on the order of  $10^5$ . It is thus essential that  $\mu_0$  be known or controllable.

**Dependence of  $\mu_0$  on the assumption that  $F$ ,  $G$ , and  $Y$  are samples of the same underlying population.**

Let us write the difference between MAFs  $f_i$  and  $g_i$  at locus  $i$  as  $\tau_i$ ,

$$f_i = g_i + \tau_i. \quad (\text{S1-8})$$

We can then write

$$D_i = |y_i - g_i - \tau_i| - |y_i - g_i|, \quad (\text{S1-9})$$

and thus

$$\mu_0 = \langle |y_i - g_i - \tau_i| - |y_i - g_i| \rangle, \quad (\text{S1-10})$$

where  $\mu_0$  is  $\langle D_i \rangle$  under the null hypothesis.

We next make a simplifying assumption: since  $p_i$  are the *minor* allele frequencies and thus  $0 \leq p_i \leq 0.5$ , and since  $f_i$  and  $g_i$  are estimates of  $p_i$ , with few exceptions we will have  $0 \leq f_i \leq 0.5$  and  $0 \leq g_i \leq 0.5$  (eliminating this assumption does not significantly alter the results). Under this assumption we can write

$$|y_i - g_i - \tau_i| - |y_i - g_i| = \begin{cases} \tau_i & \text{for } y_i = 0; \\ -\tau_i & \text{for } y_i = 0.5; \\ -\tau_i & \text{for } y_i = 1. \end{cases} \quad (\text{S1-11})$$

and hence Equation S1-10 may be written

$$\mu_0 = \sum_i \left[ \tau_i \cdot \mathbb{P}(y_i = 0|p_i) - \tau_i \cdot \mathbb{P}(y_i = 0.5|p_i) - \tau_i \cdot \mathbb{P}(y_i = 1|p_i) \right] \mathbb{P}(p_i) \mathbb{P}(\tau_i), \quad (\text{S1-12})$$

where  $\mathbb{P}(\cdot)$  denotes probability and where we have exploited the fact that because  $F$ ,  $G$  are independent samples of  $P$ ,  $\tau_i$  is independent of  $p_i$ , i.e.,  $\mathbb{P}(\tau_i|p_i) = \mathbb{P}(\tau_i)$ . Observing that

$$\begin{aligned}\mathbb{P}(y_i = 0|p_i) &= (1 - p_i)^2; \\ \mathbb{P}(y_i = 0.5|p_i) &= 2p_i(1 - p_i); \\ \mathbb{P}(y_i = 1|p_i) &= p_i^2,\end{aligned}\tag{S1-13}$$

Equation S1-12 becomes

$$\mu_0 = \sum_i (1 - 4p_i + 2p_i^2) \tau_i \mathbb{P}(p_i) \mathbb{P}(\tau_i) \tag{S1-14}$$

$$= \langle (1 - 4p_i + 2p_i^2) \tau_i \rangle, \tag{S1-15}$$

which is readily verified by simulation.

Equation S1-15 implies that when  $\tau_i$  deviates from zero, either due to systematic differences in  $F$  and  $G$  (i.e., violation of the assumption that both are drawn on the same population  $P$ ) or due to sampling variation, the location of the null distribution of the test statistic given by Equation 2 will be shifted by an amount equal to  $\langle (1 - 4p_i + 2p_i^2) \tau_i \rangle \cdot \sqrt{s/\text{Var}(D_i)}$  relative to that under the assumption that  $\mu_0 = 0$ . It is important to note that the shift is a weighted average of  $\tau_i$ ; ie, it depends not only on the differences in MAFs  $\tau_i$  but also on  $p_i$ , and hence it is not sufficient that  $\langle \tau_i \rangle = 0$ , since small  $\tau_i$  will be amplified when  $p_i$  is small and reduced when  $p_i$  is large. As a result, predicting the deviation away from  $\mu_0 = 0$  to properly calibrate  $T$  requires knowing not only  $\tau_i = f_i - g_i$ , but  $p_i$  as well.

In practice,  $\tau_i$  is easily calculated. On the other hand, knowing  $p_i$  requires making assumptions about the population from which  $Y$  is drawn. In the case where  $Y$  is, in fact, drawn on the same population as  $F$  and  $G$  (and their sample sizes are known),  $f_i$  and  $g_i$  may be used to estimate  $p_i$ . However, when  $Y$  is from a different underlying population than are  $F$  and  $G$ , the  $p_i$  are difficult to obtain from the given data and the shift in  $T$  resulting from Equation S1-15 is not readily calculated.

As a demonstration of this correction, consider the results obtained under the  $\mu_0 = 0$  assumption given in Table 2. If, instead, we recompute  $T$  using  $\mu_0$  as given by Equation S1-15 and assuming that  $p_i = (n_F \cdot f_i + n_G \cdot g_i)/(n_F + n_G)$ , the classification results become

|                             | 481,382 SNPs    |                    | 50,000 SNPs     |                    |
|-----------------------------|-----------------|--------------------|-----------------|--------------------|
|                             | $\alpha = 0.05$ | $\alpha = 10^{-6}$ | $\alpha = 0.05$ | $\alpha = 10^{-6}$ |
| Sensitivity                 | 99.90%          | 99.23%             | 97.36%          | 31.09%             |
| Specificity, 200 CGEMS      | 40.0%           | 87.0%              | 78.0%           | 99.5%              |
| Specificity, 90 HapMap CEPH | 14.4%           | 55.5%              | 54.4%           | 100.0%             |
| Specificity, 90 HapMap YRI  | 0.0%            | 0.0%               | 7.7%            | 100.0%             |

### Dependence of $\mu_0$ on sample sizes $n_F$ and $n_G$ .

The effect of deviations from the second assumption above is intuitively obvious: if  $n_G > n_F$ ,  $G$  will better approximate the underlying population  $P$  and so will be closer on average to a future sample  $Y$ . The dependence is derived explicitly as follows:

Consider  $\langle D_i \rangle$  (cf. Equation 1) under the null hypothesis assumptions that  $Y$ ,  $F$ , and  $G$  are all drawn i.i.d. from the same underlying population  $P$  with MAFs  $p_i$ . Writing the probability distribution of  $p_i$  as  $\mathbb{P}(p_i)$ ,  $\langle D_i \rangle$  is given by

$$\langle D_i \rangle = \langle |y_i - f_i| - |y_i - g_i| \rangle = \langle |y_i - f_i| \rangle - \langle |y_i - g_i| \rangle \quad (\text{S1-16})$$

$$\begin{aligned} &= \iiint_{-\infty}^{\infty} |y_i - f_i| \mathbb{P}(y_i|p_i) \mathbb{P}(f_i|p_i) \mathbb{P}(p_i) dy_i df_i dp_i - \\ &\quad - \iiint_{-\infty}^{\infty} |y_i - g_i| \mathbb{P}(y_i|p_i) \mathbb{P}(g_i|p_i) \mathbb{P}(p_i) dy_i dg_i dp_i, \end{aligned} \quad (\text{S1-17})$$

where we exploit the fact that  $Y$ ,  $F$  and  $G$  are independent of each other but depend on the underlying population MAFs.

The dependence of the first (second) term in Equation S1-17 on  $n_F$  ( $n_G$ ) is derived as follows. First, we note that since each  $y_i$  is two Bernoulli trials (two alleles) with probability  $p_i$ , we have the following values of  $|y_i - f_i|$  with probability  $\mathbb{P}(y_i|p_i)$  for each allowable value of  $y_i$ :

$$|y_i - f_i| \cdot \mathbb{P}(y_i|p_i) = \begin{cases} (1 - f_i) \cdot (p_i^2) & \text{for } y_i = 1; \\ (|0.5 - f_i|) \cdot (2p_i(1 - p_i)) & \text{for } y_i = 0.5; \\ (f_i) \cdot ((1 - p_i)^2) & \text{for } y_i = 0. \end{cases} \quad (\text{S1-18})$$

Moreover, since each  $f_i$  follows a binomial distribution of size  $2n_F$  (two alleles per person), we invoke the normal approximation to the binomial for values of  $n_F > 10$  with mean  $p_i$  and variance  $p_i(1 - p_i)/(2n_F)$ . Hence:

$$\mathbb{P}(f_i|p_i) = \sqrt{\frac{2n_F}{2\pi p_i(1 - p_i)}} \exp \left[ -\frac{2n_F(f_i - p_i)^2}{2p_i(1 - p_i)} \right] \quad (\text{S1-19})$$

$$= \frac{A_{F,i}}{\sqrt{\pi}} \exp \left[ -A_{F,i}^2 (f_i - p_i)^2 \right], \quad (\text{S1-20})$$

where we introduce

$$A_{F,i} = \sqrt{n_F/(p_i(1 - p_i))} \quad (\text{S1-21})$$

to simplify the notation. In consequence, the first term of Equation S1-17 can be written:

$$\iint_{-\infty}^{\infty} \left[ (1 - f_i)(p_i^2) + (|0.5 - f_i|)(2p_i(1 - p_i)) + (f_i)((1 - p_i)^2) \right] \cdot \frac{A_{F,i}}{\sqrt{\pi}} \exp \left[ -A_{F,i}^2(f_i - p_i)^2 \right] \mathbb{P}(p_i) df_i dp_i \quad (\text{S1-22})$$

and the second term may be written analogously for  $G$ . The absolute value in Equation S1-22 is dealt with by considering the  $f_i \geq 0.5$  and  $f_i \leq 0.5$  cases separately, i.e., treating Equation S1-22 as the sum of integrals

$$\begin{aligned} & \int_{-\infty}^{\infty} \left[ \int_{0.5}^{\infty} \left( (1 - f_i)(p_i^2) + (f_i - 0.5)(2p_i(1 - p_i)) + (f_i)((1 - p_i)^2) \right) \mathbb{P}(f_i|p_i) df_i + \right. \\ & \left. + \int_{-\infty}^{0.5} \left( (1 - f_i)(p_i^2) + (0.5 - f_i)(2p_i(1 - p_i)) + (f_i)((1 - p_i)^2) \right) \mathbb{P}(f_i|p_i) df_i \right] \mathbb{P}(p_i) dp_i \end{aligned} \quad (\text{S1-23})$$

Expanding the polynomials in Equation S1-23 and once more using Equation S1-21 to simplify notation, we rewrite the above as

$$\begin{aligned} & \int_{-\infty}^{\infty} \frac{A_{F,i}}{\sqrt{\pi}} \left[ \int_{0.5}^{\infty} (C_1 f_i + C_2) e^{-A_{F,i}^2(f_i - p_i)^2} df_i + \right. \\ & \left. + \int_{-\infty}^{0.5} (C_3 f_i + C_4) e^{-A_{F,i}^2(f_i - p_i)^2} df_i \right] \mathbb{P}(p_i) dp_i \end{aligned} \quad (\text{S1-24})$$

where  $C_1, C_2, C_3$ , and  $C_4$  are functions of  $p_i$  but independent of  $f_i$ :

$$C_1 = 1 - 2p_i^2, \quad (\text{S1-25})$$

$$C_2 = 2p_i^2 - p_i, \quad (\text{S1-26})$$

$$C_3 = 1 - 4p_i + 2p_i^2, \quad (\text{S1-27})$$

$$C_4 = p_i. \quad (\text{S1-28})$$

Performing the interior integration in Equation S1-24 yields

$$\begin{aligned} & \int_{-\infty}^{\infty} \frac{A_{F,i}}{\sqrt{\pi}} \left[ (C_1 - C_3) \left( \frac{e^{-A_{F,i}^2(0.5 - p_i)^2}}{2A_{F,i}^2} \right) + (C_3 p_i + C_4) \left( \frac{\sqrt{\pi}}{A_{F,i}} \right) + \right. \\ & \left. + \left( (C_1 - C_3)p_i + (C_2 - C_4) \right) \left( \frac{\sqrt{\pi} \operatorname{erfc}(A_{F,i}(0.5 - p_i))}{2A_{F,i}} \right) \right] \mathbb{P}(p_i) dp_i. \end{aligned} \quad (\text{S1-29})$$

Expanding out the various  $C$ s as well as  $A_{F,i}$ , we now have for the first term of  $\langle D_i \rangle$

$$\int_{-\infty}^{\infty} (p_i(1-p_i)) \left[ 2\sqrt{\frac{p_i(1-p_i)}{\pi n_F}} \exp\left(-\frac{n_F(0.5-p_i)^2}{p_i(1-p_i)}\right) + \right. \\ \left. + 2(1-p_i) + (2p_i-1)\operatorname{erfc}\left(\sqrt{\frac{n_F(0.5-p_i)^2}{p_i(1-p_i)}}\right) \right] \mathbb{P}(p_i) dp_i, \quad (\text{S1-30})$$

which has an indirect dependence on  $n_F$ . Performing the same integration for the second term in Equation S1-17 yields analogous indirect  $n_G$  dependence. As a result, when  $n_F < n_G$ , the first term is greater than the second, yielding  $\langle D_i \rangle > 0$ ; in the limit  $n_F, n_G \rightarrow \infty$ , this difference becomes smaller.

The dependence is illustrated by simulation in Figure S1-1A. Here, we assume a uniform distribution of  $p_i$  on  $(0, 0.5)$  and construct  $10^5$   $p_i$ 's for the underlying population  $P$  from which we draw, independently, a sample  $G$  of size  $n_G = 1000$  and 200 samples  $Y$  from which we estimate  $\langle D_i \rangle$  under the null hypothesis. Sample  $F$  is drawn i.i.d. from  $P$  with sample sizes ranging from  $n_F = 10$  to  $n_F = 1000$ , permitting us to plot  $\langle D_i \rangle$  as  $n_F$  is varied. The simulation results are shown as circles, overlayed with a plot of Equation S1-17 using the result in Equation S1-30 and assuming the uniform distribution of  $p_i$ . The values for  $\langle D_i \rangle$  obtained from the simulation closely matches those derived from Equation S1-30. In Figure S1-1B, the corresponding values of  $T$  are presented.

### Deviations from $\operatorname{Var}(\langle D_i \rangle) = \operatorname{Var}(D_i)/s$

Invocation of the central limit theorem to compare  $T$  to a standard normal distribution (as given in Equation 2) requires that the variance of the mean of  $D_i$  be estimable by the mean of the variance, ie,  $\operatorname{Var}(\langle D_i \rangle) = \operatorname{Var}(D_i)/s$ . This, in turn, requires that the  $D_i$  are uncorrelated. However, if the various  $D_i$  are correlated—most notably due to linkage disequilibrium—this is no longer true. Specifically, the variance of the mean for  $s$  variables  $D_i$  with variance  $\operatorname{Var}(D_i)$  and average correlation  $\rho$  amongst the distinct  $D_i$  is given by

$$\operatorname{Var}(\langle D_i \rangle) = \left( \frac{1}{s} + \frac{s-1}{s} \rho \right) \operatorname{Var}(D_i). \quad (\text{S1-31})$$

In the case where the average correlation amongst the  $D_i$ 's is zero, Equation S1-31 yields the result which is found in the denominator of Equation 2; on the other hand,  $\rho \neq 0$  generates a  $(1 + (s-1)\rho)$  multiplicative increase over the correlationless variance. The large number of SNPs  $s$  results in little room for any correlation between them: consider that Equation S1-31 dictates that for a modest number of SNPs  $s = 5 \cdot 10^4$  even a very slight

average correlation between all pairs of SNPs  $\rho = 0.002$  would result in a tenfold increase in  $\text{Var}(T)$ ; for 500K SNPs ( $s = 5 \cdot 10^5$ ),  $\rho = 0.0002$  causes a two order of magnitude increase in  $\text{Var}(T)$ . However, it is impossible to ascertain  $\rho$  simply from  $y_i$ ,  $f_i$ , and  $g_i$ . Instead, this issue may be addressed by choosing fewer SNPs and assuming that  $\rho$  is sufficiently small.

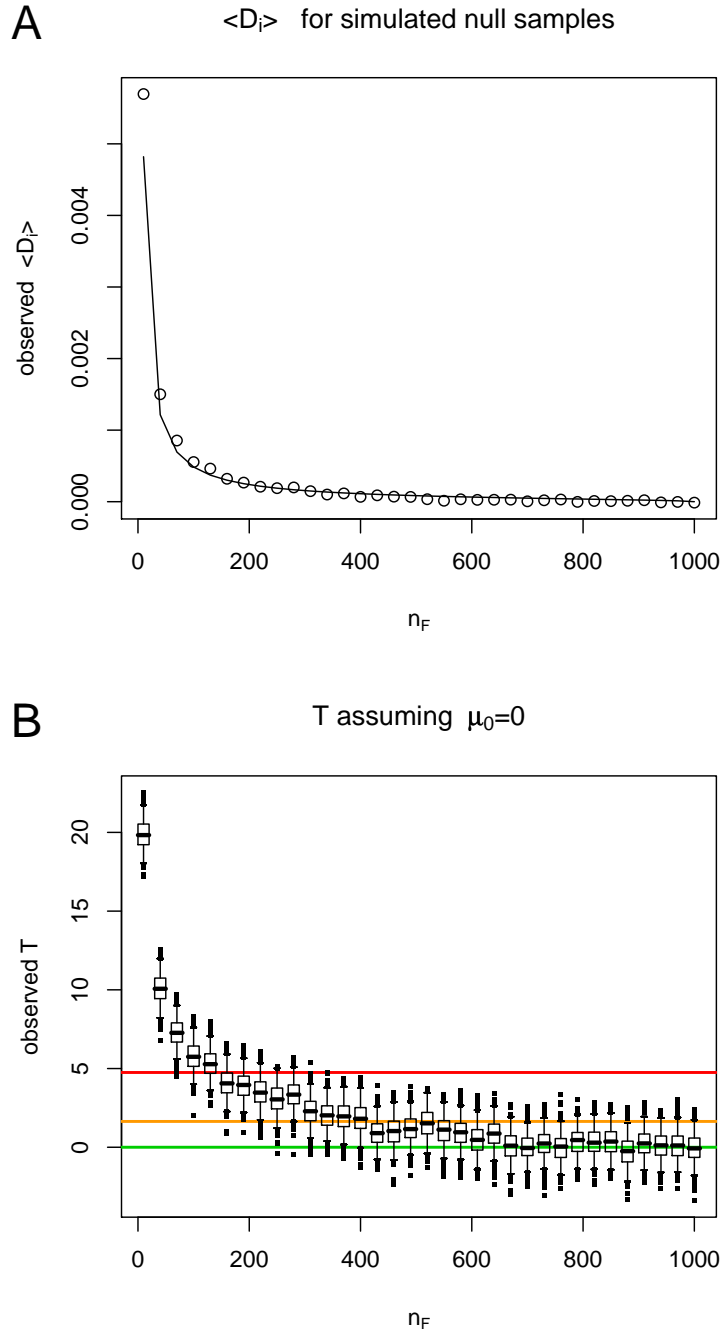

Figure S1-1: Observed  $\langle D_i \rangle$  and  $T$  values for simulated data with varying sample sizes of  $n_F$  under the  $\mu_0 = 0$  assumption. In A, open circles represent the average  $\langle D_i \rangle$  for each simulation; the solid line is the theoretical  $\langle D_i \rangle$  based on numerical integration of Eq. S1-30. In B, boxplots of the observed  $T$ s for each simulation are given assuming  $\mu_0 = 0$ ; box boundaries correspond to the 0.25 and 0.75 quantiles, and whiskers indicate the 0.05 and 0.95 quantiles ( $T$  values outside those limits are shown as square points). Horizontal lines at  $T = 0$  (green),  $T = 1.64$  (corresponding to  $\alpha = 0.05$ , in amber), and  $T = 4.75$  (corresponding to  $\alpha = 10^{-6}$ , in red) are shown for reference; note that for  $n_F < 600$ , at least 25% of null samples yield significant  $T$  at the nominal  $\alpha = 0.05$ .
